**Coming March 2022!**

## Diagnostic and Statistical Manual of Mental Disorders, Fifth Edition, Text Revision (DSM-5-TR™)

American Psychiatric Association

The *Diagnostic and Statistical Manual of Mental Disorders*, Fifth Edition, Text Revision (DSM-5-TR), is the most comprehensive, current, and critical resource for clinical practice available to today's mental health clinicians and researchers. DSM-5-TR includes the fully revised text and references, updated diagnostic criteria and ICD-10-CM codes since DSM-5 was published in 2013. It features a new disorder, Prolonged Grief Disorder, as well as codes for suicidal behavior available to all clinicians of any discipline without the requirement of any other diagnosis.

With contributions from over 200 subject matter experts, this updated volume boasts the most current text updates based on the scientific literature. Now in four-color and with the ability to authenticate each printed copy, DSM-5-TR provides a cohesive, updated presentation of criteria, diagnostic codes, and text. This latest volume offers a common language for clinicians involved in the diagnosis and study of mental disorders and facilitates an objective assessment of symptom presentations across a variety of clinical settings—inpatient, outpatient, partial hospital, consultation-liaison, clinical, private practice, and primary care.

2022 • 1,250 pages • ISBN 978-0-89042-575-6 • Hardcover • \$220.00 • Item #2575

2022 • 1,250 pages • ISBN 978-0-89042-576-3 • Paperback • \$170.00 • Item #2576

2022 • 1,250 pages • ISBN 978-0-89042-577-0 • eBook • \$136.00 • Item #2577

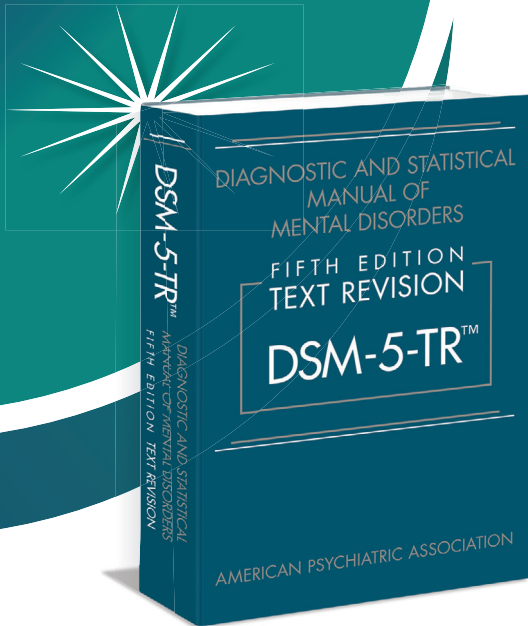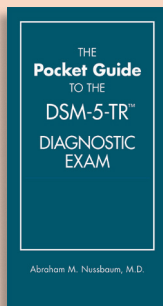

### The Pocket Guide to the DSM-5-TR® Diagnostic Exam

Abraham M. Nussbaum, M.D., M.T.S.

2022 • 295 pages  
ISBN 978-1-61537-357-4  
Paperback • \$75.00 • Item #37357

2022 • 295 pages  
ISBN 978-1-61537-358-1  
eBook • \$60.00 • Item #37358

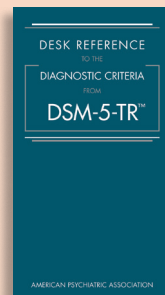

### Desk Reference to the Diagnostic Criteria from DSM-5-TR®

American Psychiatric Association

2022 • 450 pages  
ISBN 978-0-89042-579-4  
Paperback • \$75.00 • Item #2579

2022 • 450 pages  
ISBN 978-0-89042-580-0  
Spiralbound • \$75.00 • Item #2580

2022 • 450 pages  
ISBN 978-0-89042-581-7  
eBook • \$60.00 • Item #2581

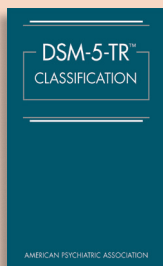

### DSM-5-TR® Classification

American Psychiatric Association

2022 • 150 pages  
ISBN 978-0-89042-583-1  
Spiralbound • \$35.00 • Item #2583

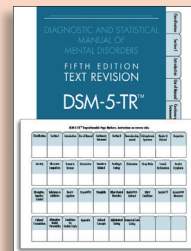

### DSM-5-TR® Repositionable Page Markers

American Psychiatric Association

2022 • 1 page  
ISBN 978-0-89042-582-4  
Repositionable Page Markers  
\$12.50 • Item #2582

AMERICAN  
PSYCHIATRIC  
ASSOCIATION  
PUBLISHING

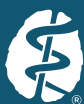

20% Discount for American Psychiatric Association Members

25% Discount for APA Resident-Fellow Members

▶ ORDER @ [www.appi.org](http://www.appi.org) | Email: [appi@psych.org](mailto:appi@psych.org) | Toll Free: 1-800-368-5777
