# The American Journal of Psychiatry

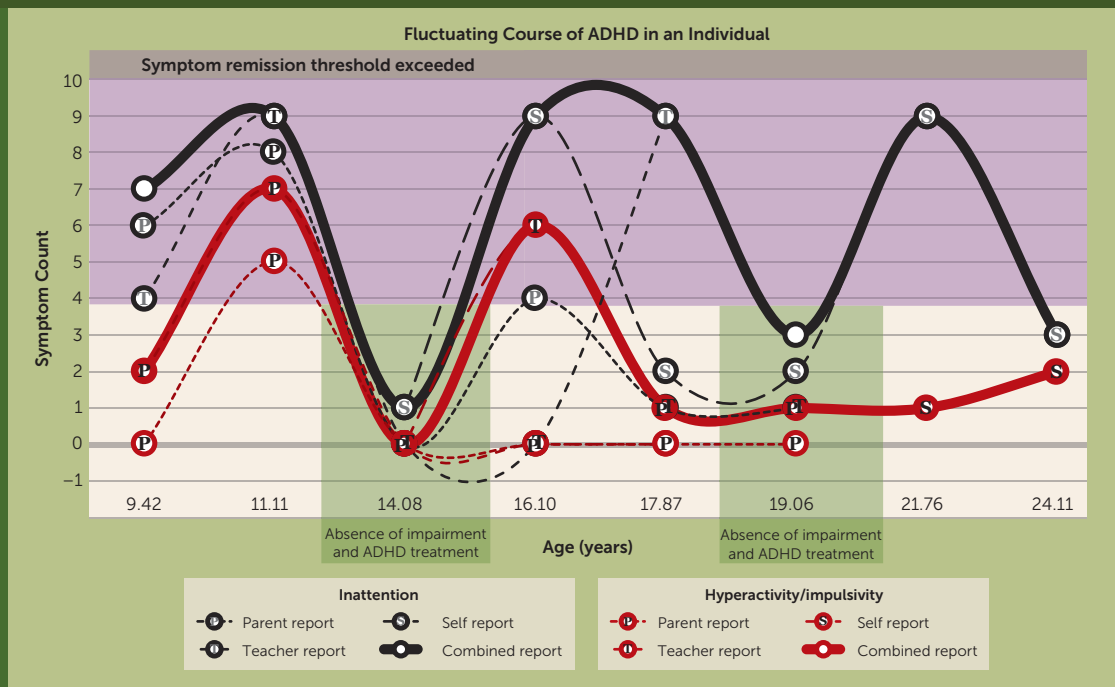

Variable Patterns of Remission From ADHD in the Multimodal Treatment Study of ADHD

Stanford Neuromodulation Therapy (SNT): A Double-Blind Randomized Controlled Trial

Risks and Benefits of Cannabis and Cannabinoids in Psychiatry

Trends in Outpatient Psychotherapy Provision by U.S. Psychiatrists: 1996–2016

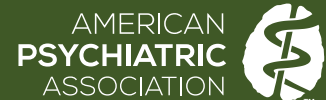

Source: https://psychiatryonline.org/doi/suppl/10.1176/ajp.2022.179.issue-2/suppl_file/cover.pdf
