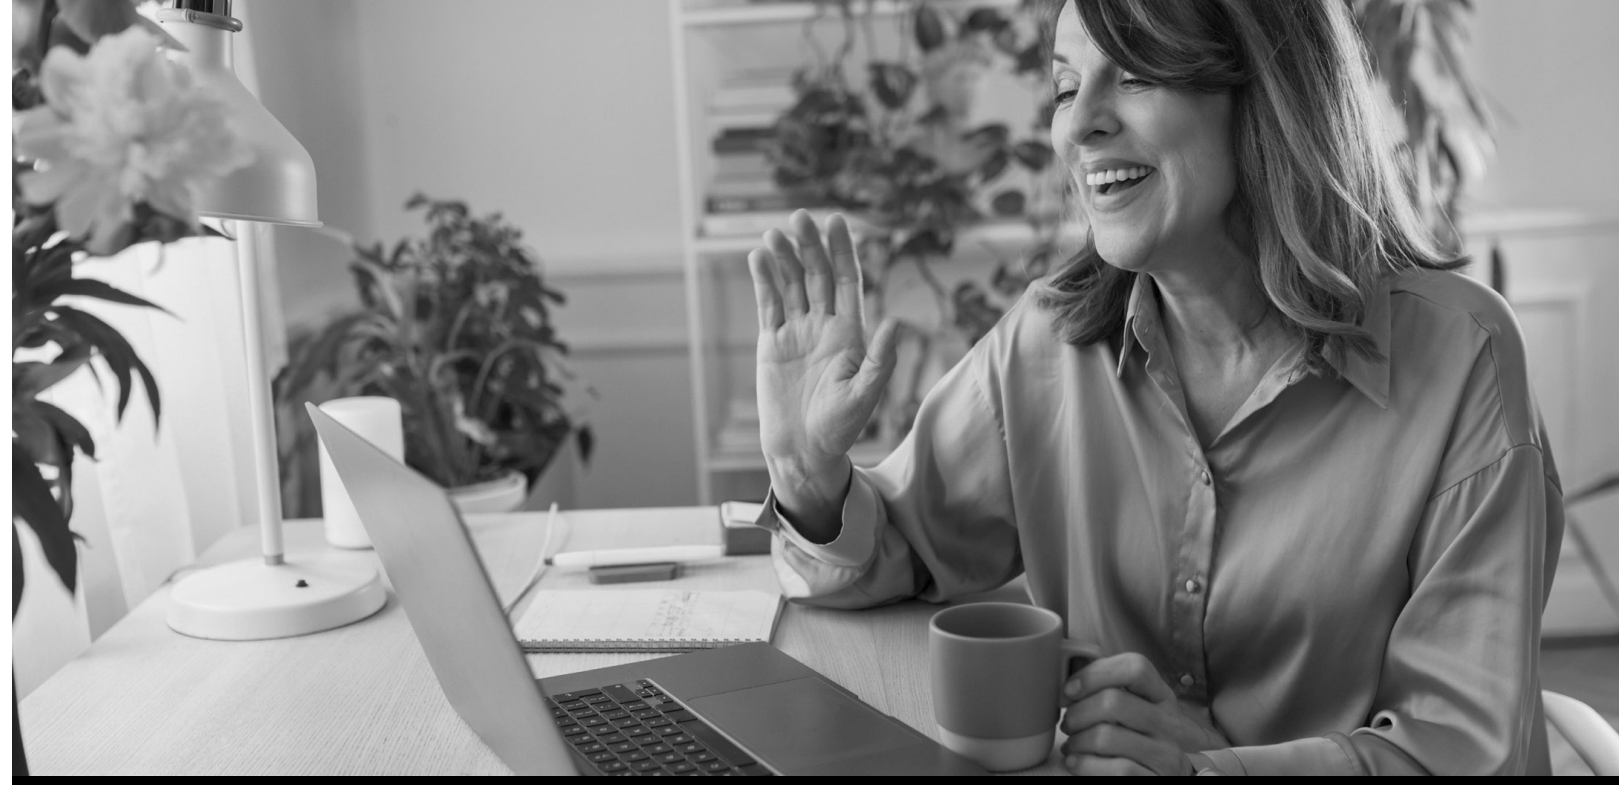

# We've Got You Covered

## American Psychiatric Association Endorsed Professional Liability Insurance Program

Designed for Psychiatrists in all practice settings

**DID YOU KNOW? We find that our policyholders are more likely to receive a board complaint than be named in a claim or lawsuit.**

Most insurance policies provided by employers do not include reimbursement for costs incurred to defend a complaint (or have limits that may be shared with others).

Not to worry... we include up to \$50,000 of defense reimbursement – with the option to increase this limit to \$150,000.

What's more, coverage for **Telepsychiatry** is provided, subject to the terms and conditions of the policy.

Cyber Coverage is available as an endorsement at renewal or on a new American Professional Agency policy. Available in most states on an admitted basis.

*(All discounts, coverage features and rating are subject to individual state approval.)*

Visit us at [apamalpractice.com](http://apamalpractice.com) or call **877-740-1777** to learn more.

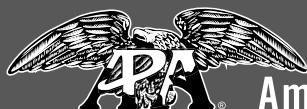

**American Professional Agency**

LEADERS IN PSYCHIATRIC MEDICAL LIABILITY INSURANCE

AMERICAN  
PSYCHIATRIC  
ASSOCIATION

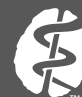

# ▶ PODCASTS from APA Publishing

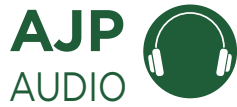

## AJP Audio

Host: Michael D. Roy, Executive Editor, *The American Journal of Psychiatry*

Each episode features an in-depth interview with an author from the most discussed article appearing in the latest issue of *The American Journal of Psychiatry*.

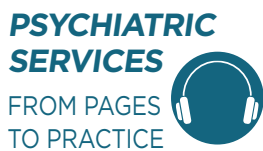

## Psychiatric Services From Pages to Practice

Hosts: Lisa Dixon, M.D., M.P.H., Editor, *Psychiatric Services*, and Josh Berezin, M.D., M.S.

Learn about the latest mental health services research published in *Psychiatric Services* and why it is relevant. Topics include community-based treatment programs, collaborative care, evidence-based treatment and service delivery, criminal and social justice, policy analysis, and more.

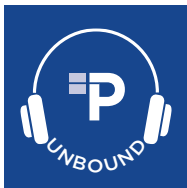

## Psychiatry Unbound

Host: Laura Roberts, M.D., M.A., Editor-in-Chief, APA Publishing Books

APA Publishing's Books podcast offers the opportunity to hear the voices behind the most prominent psychiatric scholarship in the field today. Learn about important topics in the field of psychiatry and see how our authors are making an impact in clinical settings throughout the world.

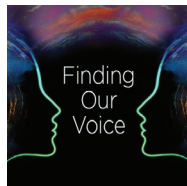

## Finding Our Voice

Host: Sanya Virani, MBBS, MPH

*Finding Our Voice* brings the viewpoints and opinions of the next generation of psychiatrists—including residents, fellows, and early career psychiatrists—to the forefront. Topics covered include systemic racism and social determinants.

Subscribe Today!

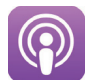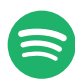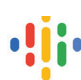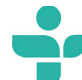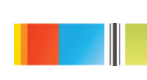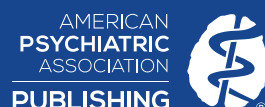

# PSYCHIATRYonline

Your Destination for Lifelong Learning in Psychiatry

The one-stop resource for information on diagnosis, treatment, guidelines, the latest research, and breaking news from the field.

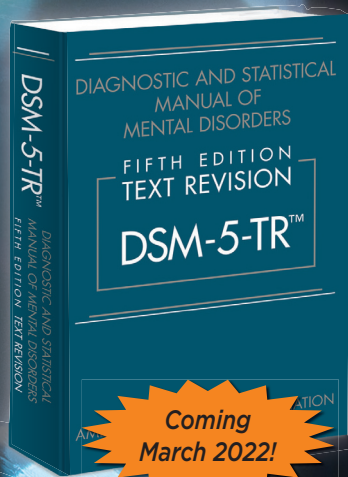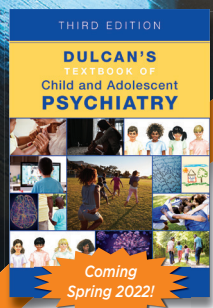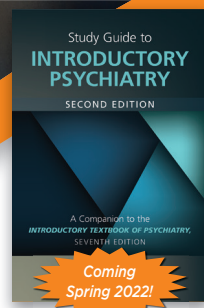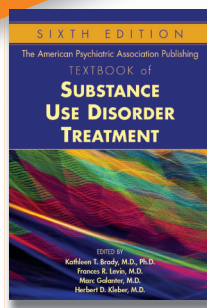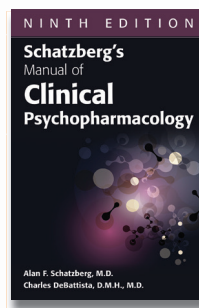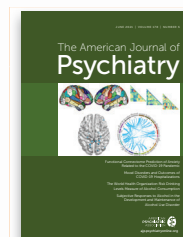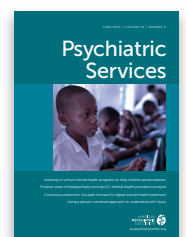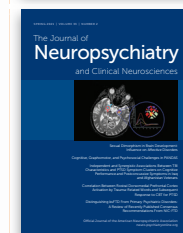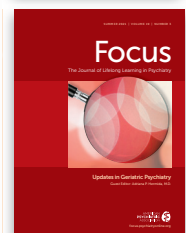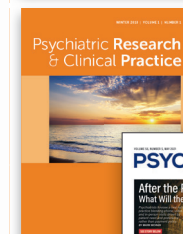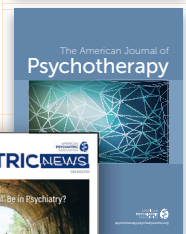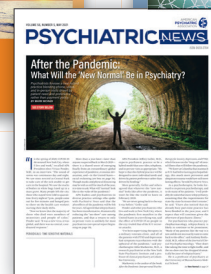

**PsychiatryOnline.org** is the platform for all American Psychiatric Association Publishing journals, DSM-5® (DSM-5-TR™ coming in March 2022), and bestselling textbooks, as well as APA Practice Guidelines, and continuing medical education.

This is a one-stop resource for information on psychiatric diagnosis, treatment, guidelines, the latest research, and breaking news from the field. From a single location, users can search across all books and journals to find the most relevant content easier than ever.

Subscribe to products individually or to the DSM Select package that includes the DSM-5® library, books and select journals.

**Go to [www.appi.org](http://www.appi.org) to subscribe.**

*Institutional subscription options are available.*

*For more information contact: [institutions@psych.org](mailto:institutions@psych.org); 800-368-5777 ext. 3729*

## Subscription and Business Information

*The American Journal of Psychiatry*, ISSN 0002-953X, is published monthly by the American Psychiatric Association.

The American Psychiatric Association does not hold itself responsible for statements made in its publications by contributors or advertisers. Unless so stated, material in *The American Journal of Psychiatry* does not reflect the endorsement, official attitude, or position of the American Psychiatric Association or of the Journal's Editorial Board.

Periodicals postage paid at Washington, DC, and additional mailing offices. POSTMASTER: Send address changes to *The American Journal of Psychiatry*, Circulation Department, American Psychiatric Association, 800 Maine Avenue, S.W., Suite 900, Washington, D.C. 20024.

### Editorial Office

*American Journal of Psychiatry*  
American Psychiatric Association  
800 Maine Avenue, S.W., Suite 900  
Washington, D.C. 20024  
E-mail: [ajp@psych.org](mailto:ajp@psych.org)

### Customer Service

Phone: (800) 368-5777 (toll-free)  
E-mail: [appi@psych.org](mailto:appi@psych.org)

### APA Member Subscription Services

Phone: (888) 35-PSYCH (toll-free)

### Subscriptions

Regular and resident-fellow members in the U.S. receive print and online access as a **member benefit**. Subscriptions for non-members start at \$378 per year. Online only subscriptions start at \$342 per year. Go to <https://www.appi.org/ajp> for more information.

Institutional subscriptions are tier priced. For institutional site license or pricing information, contact (202) 559-3729 or [institutions@psych.org](mailto:institutions@psych.org).

*Additional subscription options, including single issues and student rates*

Contact Customer Service

### Advertising

*Pharmaceutical Print and Online Advertising*  
Frank Cox, Kathleen Harrison, Tim Wolfinger  
Pharmaceutical Media, Inc.  
30 East 33rd Street  
New York, NY 10016  
Phone: (212) 904-0379  
E-mail: [twolfinger@pminy.com](mailto:twolfinger@pminy.com)

*Nonpharmaceutical and Online Sales*  
Eamon Wood  
Pharmaceutical Media, Inc.  
E-mail: [ewood@pminy.com](mailto:ewood@pminy.com)  
(see address and phone above).

### Permissions and Reprints

Material published in the journals of the American Psychiatric Association and American Psychiatric Association Publishing is protected by copyright and all rights are reserved. Material may not be reproduced in any form or by any means without written permission from the copyright owner. For permission to reproduce material published by APA, please visit <http://www.appi.org/customer-service/permissions> for more information. Permission can also be secured through the Copyright Clearance Center ([www.copyright.com](http://www.copyright.com)).

APA does not require that permission be obtained for the photocopying of isolated articles for nonprofit classroom or library reserve use; all fees associated with such permission are waived. This consent does not extend to other kinds of copying, such as copying for general distribution, for advertising or promotional purposes, for creating new collective works, or for resale. Requests for commercial distribution and bulk reprints should be directed to (202) 609-7075.

Indexed in Abstracts for Social Workers, Academic Abstracts, Biological Abstracts, Chemical Abstracts, Chicago Psychoanalytic Literature Index, Cumulative Index to Nursing Literature, Excerpta Medica, Hospital Literature Index, Index Medicus, International Nursing Index, Nutrition Abstracts, Psychological Abstracts, Science Citation Index, Social Science Source, and Social Sciences Index.

Pages are produced by KnowledgeWorks Global (Waterbury, VT) and printed by Sheridan NH (Hanover, NH) on acid-free paper effective with Volume 169, Number 1, January 2012.

© 2022 American Psychiatric Association.

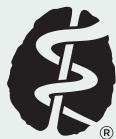

## Officers 2021–2022

### President

Vivian B. Pender, M.D.

### President-Elect

Rebecca W. Brendel, M.D., J.D.

### Treasurer

Richard F. Summers, M.D.

### Secretary

Sandra M. DeJong, M.D., M.Sc.

### Assembly

#### Speaker

Mary Jo Fitz-Gerald, M.D., M.B.A.

#### Speaker-Elect

Adam Nelson, M.D.

#### Recorder

Vasilis K. Pozios, M.D.

### Office of the CEO and Medical Director

#### CEO and Medical Director

Saul Levin, M.D., M.P.A., F.R.C.P.-E.

### Board of Trustees

Elie G. Aoun, M.D., M.R.O.

Jenny L. Boyer, M.D., Ph.D., J.D.

Kenneth Certa, M.D.

Jeffrey L. Geller, M.D., M.P.H.

Glenn A. Martin, M.D.

Eric M. Plakun, M.D.

Michele Reid, M.D.

Mary Hasbah Roessel, M.D.

Bruce J. Schwartz, M.D.

Altha J. Stewart, M.D.

Felix Torres, M.D., M.B.A.

Sanya Virani, M.D., M.P.H.

Cheryl D. Wills, M.D.

Urooj Yazdani, M.D.

Melinda Young, M.D.

## Editorial Board

### Editor-in-Chief

Ned H. Kalin, M.D.

### Deputy Editors

Elisabeth Binder, M.D., Ph.D.

Kathleen T. Brady, M.D., Ph.D.

David A. Lewis, M.D.

Daniel S. Pine, M.D.

Carolyn Rodriguez, M.D., Ph.D.

Madhukar Trivedi, M.D.

### Associate Editors

Olusola Ajilore, M.D., Ph.D.

Huda Akil, Ph.D.

Melissa Arbuckle, M.D., Ph.D.

Eraka P.J. Bath, M.D.

Kristen Brennand, Ph.D.

Karl Deisseroth, M.D., Ph.D.

Javier I. Escobar, M.D., M.Sc.

Julie L. Fudge, M.D.

Qiyong Gong, M.D., Ph.D.

Raquel E. Gur, M.D., Ph.D.

Helena Hansen, M.D., Ph.D.

David C. Henderson, M.D.

Yasmin Hurd, Ph.D.

Clinton D. Kilts, Ph.D.

Carlos López Jaramillo, M.D., M.Sc., Ph.D.

Joan L. Luby, M.D.

John C. Markowitz, M.D.

Helen S. Mayberg, M.D., F.R.C.P.C.

Terrie E. Moffitt, Ph.D.

Charles B. Nemeroff, M.D., Ph.D.

Roy Perlis, M.D.

Diego A. Pizzagalli, Ph.D.

Bryan L. Roth, M.D., Ph.D.

Alan F. Schatzberg, M.D.

Giulio Tononi, M.D., Ph.D.

Nim Tottenham, Ph.D.

John T. Walkup, M.D.

Daniel R. Weinberger, M.D.

### Editors Emeriti

Nancy C. Andreasen, M.D., Ph.D.

Robert Freedman, M.D.

### Former Editors

Amariah Brigham, M.D., 1844–1849

T. Romeyn Beck, M.D., 1849–1854

John P. Gray, M.D., 1854–1886

G. Alder Blumer, M.D., 1886–1894

Richard Dewey, M.D., 1894–1897

Henry M. Hurd, M.D., 1897–1904

Edward N. Brush, M.D., 1904–1931

Clarence B. Farrar, M.D., 1931–1965

Francis J. Braceland, M.D., 1965–1978

John C. Nemiah, M.D., 1978–1993

### Editorial Staff

#### Executive Editor

Michael D. Roy

#### Senior Editor

John J. Guardiano, Ph.D.

#### Production Manager

Susan Westrate

#### Staff Editor

Angela Moore

#### Online Content Manager

Aaron van Dorn

#### Editorial Support Services Manager

Heidi Koch-Bubel

#### Editorial Assistant

Linda LaCour

#### Editorial Assistant/ Permissions Coordinator

Megan Conley

#### Publisher

John McDuffie

## PERSPECTIVES

### EDITOR'S NOTE

#### 75 **Spanning Treatment Modalities: Psychotherapy, Psychopharmacology, and Neuromodulation**

*Ned H. Kalin, M.D.*

### EDITORIALS

#### 79 **Making Therapy Widely Available: Clinical Research Triumph or Existential Catastrophe?**

*A. John Rush, M.D.*

#### 83 **Back to the Future: Esmethadone, the (Maybe) Nonopiate Opiate, and Depression**

*Charles B. Nemeroff, M.D., Ph.D.*

#### 85 **Accelerated Intermittent Theta Burst Stimulation: Expediting and Enhancing Treatment Outcomes in Treatment-Resistant Depression**

*Cory R. Weissman, M.D., Zafiris J. Daskalakis, M.D., Ph.D.*

#### 88 **Growing Up With ADHD Symptoms: Smooth Transitions or a Bumpy Course?**

*Philip Shaw, B.M., B.Ch., Ph.D.*

### COMMENTARY

#### 90 **The Neglected Role of Psychotherapy for Treatment-Resistant Depression**

*John C. Markowitz, M.D., et al.*

### CLINICAL CASE CONFERENCE

#### 94 **Using Principles of Trauma-Informed Care to Address Structural Racism in Psychiatric Care**

*Lila Flavin, M.D., et al.* CME

### REVIEWS AND OVERVIEWS

#### 98 **Risks and Benefits of Cannabis and Cannabinoids in Psychiatry**

*Kevin P. Hill, M.D., M.H.S., et al.*

The United States is in the midst of rapid change in cannabis policy. Rising interest in the use of cannabis for medical disorders requires mental health clinicians to be knowledgeable about the available data in order to counsel both patients and colleagues on this topic. In this review, the authors outline the evidence from randomized, double-blind, placebo-controlled trials for therapeutic use of cannabinoids for specific medical conditions and the potential side effects associated with acute and chronic cannabis use.

## NEW RESEARCH

### ARTICLES

#### 110 **Trends in Outpatient Psychotherapy Provision by U.S. Psychiatrists: 1996–2016**

*Daniel Tadmon, M.Phil., Mark Olfson, M.D., M.P.H.* EDITORIAL

Between 1996 and 2016, outpatient psychotherapy delivery by U.S. psychiatrists declined by approximately half. By 2010–2016, 53% of office-based psychiatrists no longer practiced any psychotherapy. Although significant declines in its provision occurred across nearly all groups of patients, older, White, metropolitan patients in the Northeast and West remained the most likely to receive psychotherapy from their psychiatrists.

### Articles, continued

#### 122 REL-1017 (Esmethadone) as Adjunctive Treatment in Patients With Major Depressive Disorder: A Phase 2a Randomized Double-Blind Trial

Maurizio Fava, M.D., et al. EDITORIAL

The effects of esmethadone, a novel *N*-methyl-D-aspartate receptor (NMDAR) channel blocker, were investigated in patients with major depressive disorder, one to three of whom failed standard antidepressant treatments during their current major depressive episode. Favorable safety, tolerability and pharmacokinetic profiles were confirmed. Efficacy measures suggest that esmethadone might have robust, rapid, and sustained antidepressant effects compared to placebo for major depressive episodes for which antidepressant treatments have been inadequate.

#### 132 Stanford Neuromodulation Therapy (SNT): A Double-Blind Randomized Controlled Trial

Eleanor J. Cole, Ph.D., et al. EDITORIALS • CME

Results from a double-blind randomized controlled trial evaluating a novel neuromodulation therapy suggest this approach may be a reproducible, rapid, and highly effective treatment for severe, refractory depression. The aim of the study was to investigate the antidepressant efficacy of Stanford Neuromodulation Therapy (SNT) for treatment-resistant depression. After five days of treatment, 79% of participants in the active SNT group achieved remission from their depressive episodes compared to 13% in the sham group. The short 5-day treatment course and high antidepressant efficacy of SNT present an opportunity to treat patients where rapid-acting treatments are needed, such as in the ER or inpatient settings.

#### 142 Variable Patterns of Remission From ADHD in the Multimodal Treatment Study of ADHD

Margaret H. Sibley, Ph.D., et al. EDITORIAL • CME

New findings from the Multimodal Treatment Study of ADHD challenge the estimate that 50% of children with ADHD recover by adulthood. Most youth with ADHD in the sample (90%) experienced brief periods of remission but only 10% demonstrated true recovery from ADHD by age 25. Most apparent remission was temporary, revealing ADHD as a fluctuating, rather than static, disorder.

#### 152 Adjunctive Ketamine With Relapse Prevention–Based Psychological Therapy in the Treatment of Alcohol Use Disorder

Meryem Grabski, Ph.D., et al.

The utility of ketamine as an adjunctive to relapse prevention efforts for alcohol use disorder was examined in a clinical trial involving 96 patients with a severe alcohol use disorder. Patients were randomly assigned to receive three weekly ketamine or placebo infusions added to either psychological therapy or alcohol education. Findings suggest ketamine might have utility in augmenting psychotherapeutic treatment for alcohol use disorders.

### COMMUNICATIONS AND UPDATES

#### LETTERS TO THE EDITOR

#### 163 Intentional Drug Overdose Deaths in the United States

Beth Han, M.D., Ph.D., M.P.H., et al.

#### 166 Surging Racial Disparities in the U.S. Overdose Crisis

Joseph Friedman, M.P.H., et al.

### OTHER ITEMS OF INTEREST

#### 131 Correction to Fava et al.

#### 169 Correction to Cruceanu et al.

**Cover:** In a longitudinal ADHD study that provides valuable insights into the trajectory of ADHD symptoms and their patterns of remission from childhood into adulthood, Sibley and colleagues (p. 142) present new findings from the Multimodal Treatment Study of ADHD that challenge an estimate that 50% of children with ADHD recover by adulthood. Most youth with ADHD (90%) experienced periods of remission but only 10% demonstrated true recovery from ADHD by age 25. Cover image is from the authors' Figure 2 depicting a subject's fluctuating remission pattern.

# THE AMERICAN PSYCHIATRIC ASSOCIATION

800 Maine Avenue, S.W., Suite 900, Washington, D.C. 20024

(888) 357-7924 (toll-free inside the U.S. and Canada)

web site: [www.psychiatry.org](http://www.psychiatry.org) • e-mail: [apa@psych.org](mailto:apa@psych.org)

## Chairpersons of Councils, Committees, and Task Forces

### Standing Committees

|                             |                                 |
|-----------------------------|---------------------------------|
| <b>Bylaws</b>               | Edward R. Herman, J.D., M.D.    |
| <b>Elections</b>            | Justin W. Schoen, M.D.          |
| <b>Ethics</b>               | Charles Dike, M.D.              |
| <b>Finance and Budget</b>   | Ann T. Sullivan, M.D.           |
| <i>Audit</i>                | Ayana Jordan, M.D., Ph.D.       |
| <i>Investment Oversight</i> | Steven S. Sharfstein, M.D.      |
| <b>Joint Reference</b>      | Rebecca W. Brendel, M.D., J.D.  |
| <b>Membership</b>           | Kimberly A. Gordon-Achebe, M.D. |
| <b>Nominating</b>           | Jeffrey L. Geller, M.D., M.P.H. |
| <b>Tellers</b>              | Mariam F. Aboukar, D.O.         |

### Non-Standing Committee

|                             |                               |
|-----------------------------|-------------------------------|
| <b>Conflict of Interest</b> | Sandra M. DeJong, M.D., M.Sc. |
|-----------------------------|-------------------------------|

### Councils

#### Council on Addiction Psychiatry

Smita Das, M.D., M.P.H., Ph.D.

#### Council on Advocacy and Government Relations

Katherine G. Kennedy, M.D.

*Advocacy and Litigation Funding*

Bhasker J. Dave, M.D.

#### Council on Children, Adolescents, and Their Families

Gabrielle Shapiro, M.D.

*Women's Mental Health*

Ludmila B. De Faria, M.D.

#### Council on Communications

Isabel K. Norian, M.D.

#### Council on Consultation-Liaison Psychiatry

Sejal B. Shah, M.D.

#### Council on Geriatric Psychiatry

Maria D. Llorente, M.D.

#### Council on Healthcare Systems and Financing

Robert L. Trestman, M.D., Ph.D.

*Integrated Care*

Benjamin G. Druss, M.D.

*RBRVS, Codes and Reimbursement*

Gregory G. Harris, M.D.

*Reimbursement for Psychiatric Care*

Laurence H. Miller, M.D.

*Telepsychiatry*

James H. Shore, M.D.

#### Council on International Psychiatry and Global Health

David C. Henderson, M.D.

*Chester Pierce Human Rights Award Committee*

Michelle P. Durham, M.D., M.P.H.

#### Council on Medical Education and Lifelong Learning

Eindra Khin Khin, M.D.

*Innovation*

Nina Vasan, M.D.

*Scientific Program*

Catherine C. Crone, M.D.

*Scientific Program—Mental Health Services Conference*

*(Oct. to Oct. tenure)*

Sarah Y. Vinson, M.D.

*Vestermark Award Committee*

Donna Marie Sudak, M.D.

*Well-being and Burnout*

Constance Guille, M.D.

#### Council on Minority Mental Health and Health Disparities

Walter Wilson, Jr., M.D.

#### Council on Psychiatry and Law

Debra A. Pinals, M.D.

*Judicial Action*

Reena Kapoor, M.D.

#### Council on Quality Care

Carol L. Alter, M.D.

*Mental Health Information Technology*

John Torous, M.D.

*Quality and Performance Measurement*

David S. Kroll, M.D.

*Practice Guidelines*

Daniel J. Anzia, M.D.

#### Council on Research

Jonathan E. Alpert, M.D., Ph.D.

*Climate Change and Mental Health*

Elizabeth Haase, M.D.

*Psychiatric Dimensions of Disasters*

Joshua C. Morganstein, M.D.



# YOU CAN SAVE LIVES.

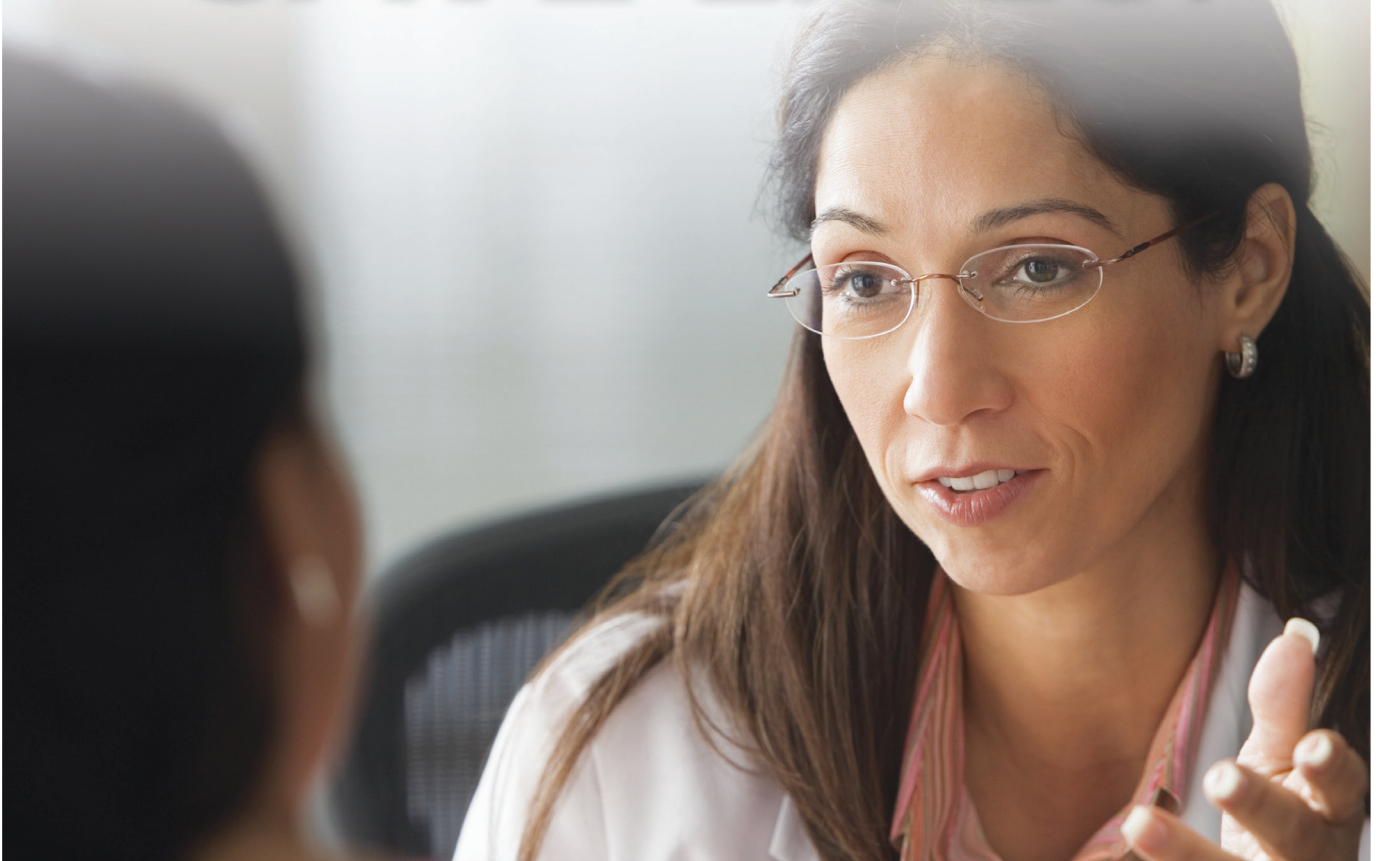

**Treating tobacco use is an important part of mental health treatment.**

**Double your patients' chances of quitting with counseling and medication.**

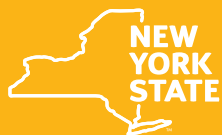

**Department  
of Health**

**[TalkToYourPatients.health.ny.gov](http://TalkToYourPatients.health.ny.gov)**

U.S. Dept. of Health and Human Services, Public Health Service, Treating Tobacco Use and Dependence Clinical Practice Guideline 2008 Update

# Treating Tobacco use is an Important Part of Mental Health Treatment

## Six Things Every Health Care Provider Should Know

Providers who treat people with mental health conditions have an important role to play in their patients' ability to quit using tobacco products. Here are six things that every provider should know:

### 1. Providing smoking cessation treatment is an important part of mental health treatment.

Providers who treat people with mental health conditions are well positioned to help patients successfully quit tobacco use and enjoy the mental, emotional, and physical benefits of a tobacco-free life. Smoking cessation treatments work.

### 2. Medicaid reimburses for counseling and covers FDA-approved smoking cessation medications, including over-the-counter therapies with a fiscal order.

Medicaid will cover repeated treatment and prescriptions because it can take multiple attempts before patients quit successfully. Medicaid covers nicotine replacement therapies (NRT) – patch, gum, lozenge, inhaler and nasal spray; and two non-nicotine oral medications (pills) – bupropion SR (brand names Zyban or Wellbutrin) and varenicline (brand name Chantix).

### 3. People with mental health conditions smoke at rates that are at least two times higher than the general population.<sup>1</sup>

They may also smoke more heavily and frequently, compared to those without mental health conditions. The Centers for Disease Control and Prevention estimates that nearly one third (31%) of all cigarettes consumed in the United States are smoked by people with mental health conditions.<sup>1</sup>

### 4. The high rates of smoking among people with mental health conditions have devastating health consequences.

Smoking-related diseases such as cardiovascular disease, lung disease, and cancer are among the most common causes of death among adults with mental health conditions.<sup>2</sup> Despite the heavy disease burden, a US national survey of mental health treatment facilities found that only about one-quarter provided services to help patients quit smoking.<sup>3</sup>

### 5. Many smokers with mental health conditions want to and are able to quit smoking.<sup>4</sup>

Research has shown that adult smokers with mental health conditions—like other smokers—want to quit, can quit, and benefit from proven smoking cessation treatments.<sup>5</sup>

### 6. Quitting smoking will not interfere with mental health recovery and may have mental health benefits.

Smoking is not an effective mental health treatment strategy. On the contrary, smoking is associated with poor clinical outcomes, such as greater depressive symptoms, greater likelihood of psychiatric hospitalization, and increased suicidal behavior.<sup>4</sup>

#### References

- Centers for Disease Control and Prevention. (2013). Vital signs: Current cigarette smoking among adults aged ≥18 years with mental illness— United States, 2009–2011. *Morbidity and Mortality Weekly Report*, 62(5), 81–7.
- Druss, B. G., Zhao, L., Von Esenwein, S., Morrato, E. H., & Marcus, S. C. (2011). Understanding excess mortality in persons with mental illness: 17-Year follow up of a nationally representative US survey. *Medical Care*, 49(6), 599-604.
- Substance Abuse and Mental Health Services Administration. (2014). The National Mental Health Services Survey (N-MHSS) data spotlight report, November 25, 2014. [http://www.samhsa.gov/data/sites/default/files/Spot148\\_NMHS\\_Smoking\\_Cessation/NMHS-Spot148-QuitSmoking-2014.pdf](http://www.samhsa.gov/data/sites/default/files/Spot148_NMHS_Smoking_Cessation/NMHS-Spot148-QuitSmoking-2014.pdf). Accessed January 15, 2016.
- Prochaska, J. J. (2011). Smoking and mental illness—Breaking the link. *New England Journal of Medicine*, 365(3), 196-198.
- Siru, R., Hulse, G. K., & Tait, R. J. (2009). Assessing motivation to quit smoking in people with mental illness: a review. *Addiction*, 104(5), 719-733.

# Go Online

Visit [ajp.psychiatryonline.org](http://ajp.psychiatryonline.org) for these features!

## AJP in Advance *Discover the latest research advances before they appear in print*

### **Interindividual Differences in Cortical Thickness and Their Genomic Underpinnings in Autism Spectrum Disorder**

Autism spectrum disorder (ASD) is accompanied by highly individualized developmental differences in brain anatomy. However, what causes this inter-individual variation, and how neuroanatomical variability translates to clinical heterogeneity in ASD, remains largely unknown. This study demonstrates that brain regions that are neuroanatomically different in ASD express more than expected genes that have previously been implicated in the condition, allowing for distinct clinical ASD subgroups to be linked to specific aspects of neuropathology based on their particular neuroanatomical fingerprint.

### **The Genetic Architecture of Obsessive-Compulsive Disorder: Contribution of Liability to OCD From Alleles Across the Frequency Spectrum**

Obsessive-compulsive disorder (OCD) is known to be substantially heritable, yet the contribution of genetic variation across the allele frequency spectrum to this heritability remains uncertain. An approach examining a large sample of individuals with OCD and control subjects genotyped for >400,000 single-nucleotide polymorphisms for which alleles are common in the population demonstrated that the majority of inherited liability for OCD traces to common genetic variation. Moreover, the distribution of risk as a function of allele frequency was consistent with expectations, indicating that balancing selection, or other more complex evolutionary forces, are not strongly at play in OCD.

## AJP CME *Earn CME credit: 3 courses per issue*

You can earn CME credits by reading articles in *The American Journal of Psychiatry*. Three articles in this issue form a short course that consists of reading the article and answering three multiple-choice questions with a single correct answer for up to 1 *AMA PRA Category 1 Credit*<sup>™</sup> each. Credit is issued only to subscribers of the online AJP CME Course Program.

See the table below for the articles in this month's issue that are the subject of a CME quiz.

#### **In this issue**

---

Using Principles of Trauma-Informed Care to Address Structural Racism in Psychiatric Care (p. 94)

---

Stanford Neuromodulation Therapy (SNT): A Double-Blind Randomized Controlled Trial (p. 132)

---

Variable Patterns of Remission From ADHD in the Multimodal Treatment Study of ADHD (p. 142)

---

@APAPubJournals

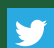

Psychiatry Online

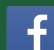

AMERICAN  
PSYCHIATRIC  
ASSOCIATION  
PUBLISHING

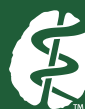

[www.appi.org](http://www.appi.org)  
1-800-368-5777  
[appi@psych.org](mailto:appi@psych.org)
